# Supplementary material for: Palladium complexes derived from N,N-bidentate NH-iminophosphorane ligands: synthesis and use as catalysts in the Sonogashira reaction
Source: Royal Society of Chemistry journal article supplement (doi:10.1039/c2dt31290e), 2012-01-01
Supplement: c2dt31290e.pdf [file c2dt31290e.pdf]

## Electronic Supplementary Information for

### Palladium complexes derived from *N,N*-bidentate NH- iminophosphorane ligands: synthesis and use as catalysts in the Sonogashira reaction

Mateo Alajarin,<sup>\*a</sup> Carmen Lopez-Leonardo,<sup>\*a</sup> Pilar Llamas-Lorente,<sup>a</sup> Rosalia  
Raja<sup>a</sup>, Delia Bautista<sup>b</sup> and Raul-Angel Orenes

<sup>a</sup>Departamento de Química Orgánica, Facultad de Química, Regional Campus of International Excellence "Campus Mare Nostrum", Universidad de Murcia, E-30100 Murcia, Spain; E-mail: [alajarin@um.es](mailto:alajarin@um.es), [melill@um.es](mailto:melill@um.es)

<sup>b</sup>Servicio Universitario de Instrumentación Científica, Edificio SACE, Universidad de Murcia, Campus de Espinardo, E-30100 Murcia, Spain; E-mail: [dbc@um.es](mailto:dbc@um.es)

**General procedure for the synthesis of compounds 4-6.** A mixture of the corresponding iminophosphorane **1-3** (0.45 mmol), benzene (15 mL) and the corresponding amine (10 equiv, 4.5 mmol) was stirred for 2-24 h under reflux (N<sub>2</sub>) until disappearance of the starting material (checked by TLC using silica gel plates deactivated with 5% Et<sub>3</sub>N in *n*-hexane and AcOEt as eluent). The solvent and the excess of amine were removed in vacuo to give compounds **4-6** as yellow oils.

**4a** (R<sup>1</sup> = 4-CH<sub>3</sub>C<sub>6</sub>H<sub>4</sub>, R<sup>2</sup> = R<sup>3</sup> = H, R<sup>4</sup> = <sup>n</sup>Pr). Yellow oil (0.16 g, 93%);  $\nu_{\max}(\text{film})/\text{cm}^{-1}$ : 3278, 1501, 1483, 1438, 1321, 1107, 734, 692; <sup>1</sup>H NMR (300 MHz; CDCl<sub>3</sub>):  $\delta$  0.83 (t, 3H, <sup>3</sup>J<sub>HH</sub> 7.3, CH<sub>2</sub>CH<sub>2</sub>CH<sub>3</sub>), 1.37 (sex, 2H, <sup>3</sup>J<sub>HH</sub> 7.3, CH<sub>2</sub>CH<sub>2</sub>CH<sub>3</sub>), 1.67 (br s, 1H, NH), 2.18 (s, 3H, CH<sub>3</sub>), 2.44 (t, 2H, <sup>3</sup>J<sub>HH</sub> 7.3, CH<sub>2</sub>CH<sub>2</sub>CH<sub>3</sub>), 2.65 (dt, 2H, <sup>2</sup>J<sub>HP</sub> 11.4, <sup>3</sup>J<sub>HH</sub> 7.1, PCH<sub>2</sub>), 2.86 (dt, 2H, <sup>3</sup>J<sub>HP</sub> 12.0, <sup>3</sup>J<sub>HH</sub> 7.1, CH<sub>2</sub>N), 6.62 (d, 2H, <sup>3</sup>J<sub>HH</sub> 8.0, H<sub>Ar</sub>), 6.82 (d, 2H, <sup>3</sup>J<sub>HH</sub> 8.0, H<sub>Ar</sub>), 7.42-7.54 (m, 6H, Ph<sub>2</sub>), 7.74-7.81 (m, 4H, Ph<sub>2</sub>); <sup>13</sup>C{<sup>1</sup>H} NMR (75 MHz; CDCl<sub>3</sub>):  $\delta$  11.57 (CH<sub>2</sub>CH<sub>2</sub>CH<sub>3</sub>), 20.33 (CH<sub>3</sub>), 22.93 (CH<sub>2</sub>CH<sub>2</sub>CH<sub>3</sub>), 28.60 (d, <sup>1</sup>J<sub>CP</sub> 72.7 Hz, PCH<sub>2</sub>), 43.01 (d, <sup>2</sup>J<sub>CP</sub> 2.2 Hz, CH<sub>2</sub>N), 51.37 (CH<sub>2</sub>CH<sub>2</sub>CH<sub>3</sub>), 122.52 (d, <sup>3</sup>J<sub>CP</sub> 18.5 Hz, C<sub>2</sub>), 125.94 (C<sub>4</sub>), 128.61 (d, <sup>3</sup>J<sub>CP</sub> 11.4 Hz, C<sub>m</sub>), 129.16 (d, <sup>4</sup>J<sub>CP</sub> 1.5 Hz, C<sub>p</sub>), 130.78 (d, <sup>1</sup>J<sub>CP</sub> 88.6 Hz, C<sub>i</sub>), 131.43 (d, <sup>2</sup>J<sub>CP</sub> 8.9 Hz, C<sub>o</sub>), 131.45 (d, <sup>4</sup>J<sub>CP</sub> 2.9 Hz, C<sub>3</sub>), 148.37 (d, <sup>2</sup>J<sub>CP</sub> 3.4 Hz, C<sub>1</sub>); <sup>31</sup>P{<sup>1</sup>H} NMR (121 MHz, CDCl<sub>3</sub>):  $\delta$  6.16.

**4b** (R<sup>1</sup> = 4-CH<sub>3</sub>C<sub>6</sub>H<sub>4</sub>, R<sup>2</sup> = R<sup>3</sup> = H, R<sup>4</sup> = <sup>i</sup>Pr). Yellow oil (0.16 g, 95%);  $\nu_{\max}(\text{film})/\text{cm}^{-1}$ : 3277, 1601, 1499, 1438, 1377, 1324, 1111, 813, 694; <sup>1</sup>H NMR (400 MHz, CDCl<sub>3</sub>):  $\delta$  0.93 (d, 6H, <sup>3</sup>J<sub>HH</sub> 6.2, CH(CH<sub>3</sub>)<sub>2</sub>), 1.46 (br s, 1H, NH), 2.18 (s, 3H, CH<sub>3</sub>), 2.62 (dt, 2H,

$^2J_{HP}$  11.2,  $^3J_{HH}$  7.2 Hz, PCH<sub>2</sub>), 2.67 [sept, 1H,  $^3J_{HH}$  = 6.2 Hz, CH(CH<sub>3</sub>)<sub>2</sub>], 2.85 (dt, 2H,  $^3J_{HP}$  12.4,  $^3J_{HH}$  7.2, CH<sub>2</sub>N), 6.62 (d, 2H,  $^3J_{HH}$  8.0, H<sub>Ar</sub>), 6.81 (d, 2H,  $^3J_{HH}$  8.0, H<sub>Ar</sub>), 7.43-7.53 (m, 6H, Ph<sub>2</sub>), 7.75-7.80 (m, 4H, Ph<sub>2</sub>);  $^{13}C\{^1H\}$  NMR (50 MHz, CDCl<sub>3</sub>):  $\delta$  20.49 (CH<sub>3</sub>), 22.74 [CH(CH<sub>3</sub>)<sub>2</sub>], 28.94 (d,  $^1J_{CP}$  73.1, PCH<sub>2</sub>), 40.67 (d,  $^2J_{CP}$  1.8, CH<sub>2</sub>N), 48.29 [CH(CH<sub>3</sub>)<sub>2</sub>], 122.65 (d,  $^3J_{CP}$  18.6, C<sub>2</sub>), 126.13 (C<sub>4</sub>), 128.78 (d,  $^3J_{CP}$  11.3, C<sub>m</sub>), 129.33 (d,  $^4J_{CP}$  1.5, C<sub>3</sub>), 130.91 (d,  $^1J_{CP}$  89.5, C<sub>i</sub>), 131.60 (d,  $^2J_{CP}$  9.0, C<sub>o</sub>), 131.63 (d,  $^4J_{CP}$  2.9, C<sub>p</sub>), 148.50 (d,  $^2J_{CP}$  3.5, C<sub>1</sub>);  $^{31}P\{^1H\}$  NMR (121 MHz, CDCl<sub>3</sub>):  $\delta$  5.77;  $m/z$  (EI): 377 (M<sup>+</sup> + 1, 2%), 318 (35), 290 (100), 214 (60), 183 (80); HRMS (ESI): calcd for C<sub>24</sub>H<sub>30</sub>N<sub>2</sub>P [M + H]<sup>+</sup>, 377.2141; found, 377.2144.

**4c** (R<sup>1</sup> = 4-CH<sub>3</sub>C<sub>6</sub>H<sub>4</sub>, R<sup>2</sup> = R<sup>3</sup> = H, R<sup>4</sup> = <sup>n</sup>Bu). Yellow oil (0.17 g, 98%);  $\nu_{max}$ (film)/cm<sup>-1</sup>: 3278, 1601, 1501, 1480, 1433, 1322, 1108, 822, 740, 711, 693;  $^1H$  NMR (300 MHz, CDCl<sub>3</sub>):  $\delta$  0.85 (t, 3H,  $^3J_{HH}$  7.1, CH<sub>2</sub>CH<sub>2</sub>CH<sub>2</sub>CH<sub>3</sub>), 1.25-1.33 (m, 4H, CH<sub>2</sub>CH<sub>2</sub>CH<sub>2</sub>CH<sub>3</sub>), 1.46 (br s, 1H, NH), 2.18 (s, 3H, CH<sub>3</sub>), 2.46 (t, 2H,  $^3J_{HH}$  6.8, CH<sub>2</sub>CH<sub>2</sub>CH<sub>2</sub>CH<sub>3</sub>), 2.65 (dt, 2H,  $^2J_{HP}$  11.1,  $^3J_{HH}$  7.1, PCH<sub>2</sub>), 2.86 (dt, 2H,  $^3J_{HP}$  11.8,  $^3J_{HH}$  7.1, CH<sub>2</sub>N), 6.62 (d, 2H,  $^3J_{HH}$  8.0, H<sub>Ar</sub>), 6.82 (d, 2H,  $^3J_{HH}$  8.0, H<sub>Ar</sub>), 7.43-7.53 (m, 6H, Ph<sub>2</sub>), 7.75-7.81 (m, 4H, Ph<sub>2</sub>);  $^{13}C\{^1H\}$  NMR (75 MHz, CDCl<sub>3</sub>):  $\delta$  13.91 (CH<sub>2</sub>CH<sub>2</sub>CH<sub>2</sub>CH<sub>3</sub>), 20.33 (CH<sub>3</sub>), 20.43 (CH<sub>2</sub>CH<sub>2</sub>CH<sub>2</sub>CH<sub>3</sub>), 28.59 (d,  $^1J_{CP}$  72.4, PCH<sub>2</sub>), 32.02 (CH<sub>2</sub>CH<sub>2</sub>CH<sub>2</sub>CH<sub>3</sub>), 43.14 (d,  $^2J_{CP}$  1.5, CH<sub>2</sub>N), 49.29 (CH<sub>2</sub>CH<sub>2</sub>CH<sub>2</sub>CH<sub>3</sub>), 122.62 (d,  $^3J_{CP}$  18.5, C<sub>2</sub>), 126.13 (C<sub>4</sub>), 128.73 (d,  $^3J_{CP}$  11.4, C<sub>m</sub>), 129.28 (d,  $^4J_{CP}$  1.5, C<sub>p</sub>), 130.89 (d<sub>right</sub>, C<sub>i</sub>), 131.54 (d,  $^2J_{CP}$  8.9, C<sub>o</sub>), 131.58 (d,  $^4J_{CP}$  2.9, C<sub>3</sub>), 148.42 (d,  $^2J_{CP}$  3.5, C<sub>1</sub>);  $^{31}P\{^1H\}$  NMR (121 MHz, CDCl<sub>3</sub>):  $\delta$  6.13;  $m/z$  (ED): 391 (M<sup>+</sup> + 1, 20%), 302 (92), 291 (73), 259 (85), 201 (100), 99 (99); HRMS (ESI): calcd for C<sub>25</sub>H<sub>32</sub>N<sub>2</sub>P [M + H]<sup>+</sup>, 391.2298; found, 391.2303.

**4d** (R<sup>1</sup> = 4-CH<sub>3</sub>OC<sub>6</sub>H<sub>4</sub>, R<sup>2</sup> = R<sup>3</sup> = H, R<sup>4</sup> = <sup>n</sup>Pr). See reference 8b.

**4e** (R<sup>1</sup> = 4-CH<sub>3</sub>OC<sub>6</sub>H<sub>4</sub>, R<sup>2</sup> = R<sup>3</sup> = H, R<sup>4</sup> = <sup>n</sup>Bu). Yellow oil (0.18 g, 97%);  $\nu_{max}$ (film)/cm<sup>-1</sup>: 3297, 1500, 1462, 1434, 1332, 1103, 825, 715, 693;  $^1H$  NMR (300 MHz, CDCl<sub>3</sub>):  $\delta$  0.85 (t, 3H,  $^3J_{HH}$  7.1, CH<sub>2</sub>CH<sub>2</sub>CH<sub>2</sub>CH<sub>3</sub>), 1.18-1.38 (m, 4H, CH<sub>2</sub>CH<sub>2</sub>CH<sub>2</sub>CH<sub>3</sub>), 1.61 (br s, 1H, NH), 2.47 (t, 2H,  $^3J_{HH}$  7.0, CH<sub>2</sub>CH<sub>2</sub>CH<sub>2</sub>CH<sub>3</sub>), 2.64 (dt, 2H,  $^2J_{HP}$  11.3,  $^3J_{HH}$  7.3, PCH<sub>2</sub>), 2.86 (dt, 2H,  $^3J_{HP}$  11.9,  $^3J_{HH}$  7.3, CH<sub>2</sub>N), 3.68 (s, 3H, OCH<sub>3</sub>), 6.50 (d, 2H,  $^3J_{HH}$  9.5, H<sub>Ar</sub>), 6.60 (d, 2H,  $^3J_{HH}$  9.5, H<sub>Ar</sub>), 7.42-7.54 (m, 6H, Ph<sub>2</sub>), 7.74-7.81 (m, 4H, Ph<sub>2</sub>);  $^{13}C\{^1H\}$  NMR (75 MHz, CDCl<sub>3</sub>):  $\delta$  13.83 (CH<sub>2</sub>CH<sub>2</sub>CH<sub>2</sub>CH<sub>3</sub>), 20.25 (CH<sub>2</sub>CH<sub>2</sub>CH<sub>2</sub>CH<sub>3</sub>), 28.48 (d,  $^1J_{CP}$  71.9, PCH<sub>2</sub>), 31.95 (CH<sub>2</sub>CH<sub>2</sub>CH<sub>2</sub>CH<sub>3</sub>), 43.07 (CH<sub>2</sub>N), 49.21 (CH<sub>2</sub>CH<sub>2</sub>CH<sub>2</sub>CH<sub>3</sub>), 55.39 (OCH<sub>3</sub>), 114.18 (C<sub>3</sub>), 123.18 (d,  $^3J_{CP}$  17.9, C<sub>2</sub>), 128.64 (d,

$^3J_{CP}$  11.2,  $C_m$ ), 130.98 (d,  $^1J_{CP}$  90.3,  $C_i$ ), 131.45 (d,  $^2J_{CP}$  8.2,  $C_o$ ), 131.48 (d,  $^4J_{CP}$  2.7,  $C_p$ ), 144.51 (d,  $^2J_{CP}$  2.9,  $C_1$ ), 151.67 ( $C_4$ );  $^{31}P\{^1H\}$  NMR (121 MHz,  $CDCl_3$ ):  $\delta$  5.61;  $m/z$  (EI): 407 ( $M^+ + 1$ , 9%), 307 (40), 302 (93), 259 (84), 201 (100), 183(43), 100 (99); HRMS (ESI): calcd for  $C_{25}H_{32}N_2OP$  [ $M + H$ ] $^+$ , 407.2247; found, 407.2252.

**4f** ( $R^1 = 4-BrC_6H_4$ ,  $R^2 = R^3 = H$ ,  $R^4 = ^iPr$ ). Yellow oil (0.18 g, 92%);  $\nu_{max}(\text{film})/\text{cm}^{-1}$ : 3284, 1572, 1476, 1432, 1321, 1107, 823, 746, 694;  $^1H$  NMR (300 MHz,  $CDCl_3$ ):  $\delta$  0.93 [d, 6H,  $^3J_{HH}$  6.2,  $CH(CH_3)_2$ ], 1.51 (br s, 1H, NH), 2.54 (dt, 2H,  $^2J_{HP}$  11.3,  $^3J_{HH}$  7.2,  $PCH_2$ ), 2.61 [sept, 1H,  $^3J_{HH} = 6.2$  Hz,  $CH(CH_3)_2$ ], 2.85 (dt, 2H,  $^3J_{HP}$  12.5,  $^3J_{HH}$  7.2,  $CH_2N$ ), 6.56 (d, 2H,  $^3J_{HH}$  8.5,  $H_{Ar}$ ), 7.06 (d, 2H,  $^3J_{HH}$  8.5,  $H_{Ar}$ ), 7.44-7.57 (m, 6H,  $Ph_2$ ), 7.69-7.79 (m, 4H,  $Ph_2$ );  $^{13}C\{^1H\}$  NMR (75 MHz,  $CDCl_3$ ):  $\delta$  22.64 [ $CH(CH_3)_2$ ], 28.84 (d,  $^1J_{CP}$  73.5,  $PCH_2$ ), 40.46 (d,  $^2J_{CP}$  2.3,  $CH_2N$ ), 48.18 [ $CH(CH_3)_2$ ], 109.08 ( $C_4$ ), 124.36 (d,  $^3J_{CP}$  18.8,  $C_2$ ), 128.83 (d,  $^3J_{CP}$  11.4,  $C_m$ ), 129.58 (d,  $^1J_{CP}$  90.0,  $C_i$ ), 131.32 (d,  $^4J_{CP}$  1.5,  $C_3$ ), 131.44 (d,  $^2J_{CP}$  9.1,  $C_o$ ), 131.81 (d,  $^4J_{CP}$  2.8,  $C_p$ ), 150.50 (d,  $^2J_{CP}$  3.4,  $C_1$ );  $^{31}P\{^1H\}$  NMR (121 MHz,  $CDCl_3$ ):  $\delta$  7.77.  $m/z$  (EI): 441 ( $M^+ + 1$ , 2), 382 (18), 355 (76), 185 (100), 183 (84); HRMS (ESI): calcd for  $C_{23}H_{27}BrN_2P$  [ $M + H$ ] $^+$ , 441.1090; found, 441.1092.

**5a** ( $R^1 = 4-CH_3C_6H_4$ ,  $R^2 = C_6H_5$ ,  $R^3 = H$ ,  $R^4 = ^nPr$ ). Yellow oil (0.19 g, 95%);  $\nu_{max}(\text{film})/\text{cm}^{-1}$ : 3344, 1604, 1507, 1438, 1335, 1101, 754, 718;  $^1H$  NMR (200 MHz,  $CDCl_3$ ):  $\delta$  0.76 (t, 3H,  $^3J_{HH}$  7.3,  $CH_2CH_2CH_3$ ), 1.33 (sex, 2H,  $^3J_{HH}$  7.3,  $CH_2CH_2CH_3$ ), 2.17 (s, 3H,  $CH_3$ ), 2.41-2.47 (m, 2H,  $CH_2CH_2CH_3$ ), 3.23 (ddd, 1H,  $^2J_{HH}$  12.1,  $^3J_{HH}$  9.9,  $^3J_{HP}$  7.6,  $CH_AH_B$ ), 3.42 (ddd, 1H,  $^2J_{HH}$  12.1,  $^3J_{HP}$  7.6,  $^3J_{HH}$  4.5 Hz,  $CH_AH_B$ ), 3.84 (ddd, 1H,  $^2J_{HP}$  11.2,  $^3J_{HH}$  9.9,  $^3J_{HH}$  4.5,  $PCH$ ), 6.58 (d, 2H,  $^3J_{HH}$  8.1,  $H_{Ar}$ ), 6.79 (d, 2H,  $^3J_{HH}$  8.1,  $H_{Ar}$ ), 7.15-7.27 (m, 9H,  $Ph + Ph_2$ ), 7.28-7.38 (m, 1H,  $Ph_2$ ), 7.45-7.60 (m, 3H,  $Ph_2$ ), 7.80-7.90 (m, 2H,  $Ph_2$ ) and not observable NH;  $^{13}C\{^1H\}$  NMR (50 MHz,  $CDCl_3$ ):  $\delta$  11.66 ( $CH_2CH_2CH_3$ ), 20.54 ( $CH_3$ ), 22.94 ( $CH_2CH_2CH_3$ ), 48.10 (d,  $^1J_{CP}$  76.2,  $PCH$ ), 49.90 ( $CH_2N$ ), 51.34 ( $CH_2CH_2CH_3$ ), 123.10 (d,  $^3J_{CP}$  17.8,  $C_2$ ), 125.91 ( $C_4$ ), 127.38 (d,  $^5J_{CP}$  3.0,  $C_4$ ), 127.99 (d,  $^3J_{CP}$  11.3,  $C_m$ ), 128.16 (d,  $^4J_{CP}$  2.4,  $C_3$ ), 128.62 (d,  $^1J_{CP}$  87.2,  $C_i$ ), 128.82 (d,  $^3J_{CP}$  10.8,  $C_m$ ), 129.16 (d,  $^4J_{CP}$  1.5,  $C_3$ ), 130.11 (d,  $^1J_{CP}$  78.8,  $C_i$ ), 130.28 (d,  $^3J_{CP}$  5.4,  $C_2$ ), 131.27 (d,  $^4J_{CP}$  2.8,  $C_p$ ), 131.76 (d,  $^4J_{CP}$  2.8,  $C_p$ ), 132.49 (d,  $^2J_{CP}$  8.4,  $C_o$ ), 132.52 (d,  $^2J_{CP}$  8.5,  $C_o$ ), 134.86 (d,  $^2J_{CP}$  5.6,  $C_1$ ), 148.59 (d,  $^2J_{CP}$  4.1,  $C_1$ );  $^{31}P\{^1H\}$  NMR (81 MHz,  $CDCl_3$ ):  $\delta$  8.44;  $m/z$  (EI): 453 ( $M^+ + 1$ , 9%), 452 ( $M^+$ , 19), 393 (96), 381 (95), 291 (100), 275 (53), 214 (69), 212 (56), 183 (63); HRMS (ESI): calcd for  $C_{30}H_{34}N_2P$  [ $M + H$ ] $^+$ , 453.2454; found, 453.2459.

**5b** ( $R^1 = 4\text{-BrC}_6\text{H}_4$ ,  $R^2 = \text{C}_6\text{H}_5$ ,  $R^3 = \text{H}$ ,  $R^4 = n\text{Pr}$ ). Yellow oil (0.22 g, 96%);  $\nu_{\text{max}}(\text{film})/\text{cm}^{-1}$ : 3350, 1569, 1483, 1436, 1344, 1105, 734, 698;  $^1\text{H NMR}$  (400 MHz,  $\text{CDCl}_3$ ):  $\delta$  0.79 (t, 3H,  $^3J_{\text{HH}} = 7.4$  Hz,  $\text{CH}_2\text{CH}_2\text{CH}_3$ ), 1.37 (sex, 2H,  $^3J_{\text{HH}} 7.3$ ,  $\text{CH}_2\text{CH}_2\text{CH}_3$ ), 2.42-2.55 (m, 2H,  $\text{CH}_2\text{CH}_2\text{CH}_3$ ), 3.22 (ddd, 1H,  $^2J_{\text{HH}} 12.1$ ,  $^3J_{\text{HP}} 7.8$ ,  $^3J_{\text{HH}} 4.7$ ,  $\text{CH}_A\text{H}_B$ ), 3.41 (ddd, 1H,  $^2J_{\text{HH}} 12.1$ ,  $^3J_{\text{HP}} 9.5$ ,  $^3J_{\text{HH}} 9.5$ ,  $\text{CH}_A\text{H}_B$ ), 3.95 (br s, 1H, PCH), 6.50 (d, 2H,  $^3J_{\text{HH}} 8.7$ ,  $\text{H}_{\text{Ar}}$ ), 7.02 (d, 2H,  $^3J_{\text{HH}} 8.7$ ,  $\text{H}_{\text{Ar}}$ ), 7.07-7.22 (m, 9H, Ph + Ph<sub>2</sub>), 7.36-7.39 (m, 1H, Ph<sub>2</sub>), 7.49-7.59 (m, 3H, Ph<sub>2</sub>), 7.80-7.85 (m, 2H, Ph<sub>2</sub>) and not observable NH;  $^{13}\text{C}\{^1\text{H}\}$  NMR (100 MHz,  $\text{CDCl}_3$ ):  $\delta$  11.62 ( $\text{CH}_2\text{CH}_2\text{CH}_3$ ), 22.72 ( $\text{CH}_2\text{CH}_2\text{CH}_3$ ), 47.39 (d,  $^1J_{\text{CP}} 76.8$ , PCH), 49.60 ( $\text{CH}_2\text{N}$ ), 51.13 ( $\text{CH}_2\text{CH}_2\text{CH}_3$ ), 109.16 ( $\text{C}_4$ ), 124.75 (d,  $^3J_{\text{CP}} 18.0$ ,  $\text{C}_2$ ), 127.32 (d,  $^1J_{\text{CP}} 86.7$ ,  $\text{C}_i$ ), 127.62 (d,  $^5J_{\text{CP}} 2.8$ ,  $\text{C}_4'$ ), 128.18 (d,  $^3J_{\text{CP}} 11.9$ ,  $\text{C}_m$ ), 128.25 (d,  $^4J_{\text{CP}} 2.9$ ,  $\text{C}_3'$ ), 128.98 (d,  $^3J_{\text{CP}} 11.1$ ,  $\text{C}_m$ ), 129.27 ( $\text{d}_{\text{left}}$ ,  $\text{C}_i$ ), 130.13 (d,  $^3J_{\text{CP}} 5.4$ ,  $\text{C}_2'$ ), 131.26 ( $\text{C}_3$ ), 131.70 (d,  $^4J_{\text{CP}} 2.6$ ,  $\text{C}_p$ ), 132.14 (d,  $^4J_{\text{CP}} 2.6$ ,  $\text{C}_p$ ), 132.44 (d,  $^2J_{\text{CP}} 8.6$ ,  $\text{C}_o$ ), 132.60 (d,  $^2J_{\text{CP}} 8.5$ ,  $\text{C}_o$ ), 134.22 (d,  $^2J_{\text{CP}} 5.5$ ,  $\text{C}_1'$ ) 150.55 (d,  $^2J_{\text{CP}} 1.6$ ,  $\text{C}_1$ );  $^{31}\text{P}\{^1\text{H}\}$  NMR (81 MHz,  $\text{CDCl}_3$ ):  $\delta$  9.80;  $m/z$  (EI): 518 ( $\text{M}^+ + 2$ , 81%), 517 ( $\text{M}^+ + 1$ , 75), 516 ( $\text{M}^+$ , 100), 183 (20), 132 (100); HRMS (ESI): calcd for  $\text{C}_{29}\text{H}_{31}\text{BrN}_2\text{P}$  [ $\text{M} + \text{H}$ ] $^+$ , 517.1403; found, 517.1406.

**5c** ( $R^1 = 4\text{-BrC}_6\text{H}_4$ ,  $R^2 = \text{C}_6\text{H}_5$ ,  $R^3 = \text{H}$ ,  $R^4 = i\text{Pr}$ ). Yellow oil (0.23 g, 98%);  $\nu_{\text{max}}(\text{film})/\text{cm}^{-1}$ : 3350, 1573, 1450, 1438, 1340, 1103, 739, 698;  $^1\text{H NMR}$  (400 MHz,  $\text{CDCl}_3$ ):  $\delta$  0.88 [d, 3H,  $^3J_{\text{HH}} 6.6$ ,  $\text{CH}(\text{CH}_3)_2$ ], 0.90 [d, 3H,  $^3J_{\text{HH}} 6.5$ ,  $\text{CH}(\text{CH}_3)_2$ ], 2.69 [m, 1H,  $\text{CH}(\text{CH}_3)_2$ ], 3.23 (ddd, 1H,  $^2J_{\text{HH}} 12.0$ ,  $^3J_{\text{HP}} 8.0$ ,  $^3J_{\text{HH}} 4.1$ ,  $\text{CH}_A\text{H}_B$ ), 3.36 (ddd, 1H,  $^2J_{\text{HH}} 12.0$ ,  $^3J_{\text{HH}} 9.7$ ,  $^3J_{\text{HP}} 8.0$ ,  $\text{CH}_A\text{H}_B$ ), 3.80 (br s, 1H, PCH), 6.50 (d, 2H,  $^3J_{\text{HH}} 8.6$ ,  $\text{H}_{\text{Ar}}$ ), 7.03 (d, 2H,  $^3J_{\text{HH}} 8.6$ ,  $\text{H}_{\text{Ar}}$ ), 7.10-7.22 (m, 9H, Ph + Ph<sub>2</sub>), 7.35-7.38 (m, 1H, Ph<sub>2</sub>), 7.49-7.60 (m, 3H, Ph<sub>2</sub>), 7.80-7.85 (m, 2H, Ph<sub>2</sub>) and not observable NH;  $^{13}\text{C}\{^1\text{H}\}$  NMR (100 MHz,  $\text{CDCl}_3$ ):  $\delta$  22.66 [ $\text{CH}(\text{CH}_3)_2$ ], 22.84 [ $\text{CH}(\text{CH}_3)_2$ ], 47.40 ( $\text{CH}_2\text{N}$ ), 48.02 (d,  $^1J_{\text{CP}} 77.9$ , PCH), 48.14 [ $\text{CH}(\text{CH}_3)_2$ ], 109.03 ( $\text{C}_4$ ), 124.90 (d,  $^3J_{\text{CP}} 18.0$ ,  $\text{C}_2$ ), 127.42 ( $\text{d}_{\text{right}}$ ,  $\text{C}_i$ ), 127.61 (d,  $^5J_{\text{CP}} 2.9$ ,  $\text{C}_4'$ ), 128.19 (d,  $^3J_{\text{CP}} 11.3$ ,  $\text{C}_m$ ), 128.29 (d,  $^4J_{\text{CP}} 2.4$ ,  $\text{C}_3'$ ), 128.99 (d,  $^3J_{\text{CP}} 11.1$ ,  $\text{C}_m$ ), 129.74 ( $\text{d}_{\text{left}}$ ,  $\text{C}_i$ ), 130.24 (d,  $^3J_{\text{CP}} 5.3$ ,  $\text{C}_2'$ ), 131.28 (d,  $^4J_{\text{CP}} 1.0$ ,  $\text{C}_3$ ), 131.62 (d,  $^4J_{\text{CP}} 2.6$ ,  $\text{C}_p$ ), 132.09 (d,  $^4J_{\text{CP}} 2.7$ ,  $\text{C}_p$ ), 132.45 (d,  $^2J_{\text{CP}} 8.8$ ,  $\text{C}_o$ ), 132.54 (d,  $^2J_{\text{CP}} 9.4$ ,  $\text{C}_o$ ), 134.50 (d,  $^2J_{\text{CP}} 5.6$ ,  $\text{C}_1'$ ) 150.70 (d,  $^2J_{\text{CP}} 4.2$ ,  $\text{C}_1$ );  $^{31}\text{P}\{^1\text{H}\}$  NMR (81 MHz,  $\text{CDCl}_3$ ):  $\delta$  9.12;  $m/z$  (EI): 518 ( $\text{M}^+ + 2$ , 61%), 517 ( $\text{M}^+ + 1$ , 30), 516 ( $\text{M}^+$ , 100), 501 (96), 356 (51), 183 (66), 162 (100); HRMS (ESI): calcd for  $\text{C}_{29}\text{H}_{31}\text{BrN}_2\text{P}$  [ $\text{M} + \text{H}$ ] $^+$ , 517.1403; found, 517.1404.

**5d** ( $R^1 = 4\text{-BrC}_6\text{H}_4$ ,  $R^2 = \text{C}_6\text{H}_5$ ,  $R^3 = \text{H}$ ,  $R^4 = \textit{n}\text{Bu}$ ). Yellow oil (0.2 g, 97%);  $\nu_{\text{max}}(\text{film})/\text{cm}^{-1}$ : 3293, 1577, 1456, 1341, 1105, 1069, 1037, 1022, 999;  $^1\text{H NMR}$  (400 MHz,  $\text{CDCl}_3$ ):  $\delta$  0.83 (t, 3H,  $^3J_{\text{HH}}$  7.3,  $\text{CH}_2\text{CH}_2\text{CH}_2\text{CH}_3$ ), 1.42-1.50 (m, 2H,  $\text{CH}_2\text{CH}_2\text{CH}_2\text{CH}_3$ ), 2.47-2.59 (m, 2H,  $\text{CH}_2\text{CH}_2\text{CH}_2\text{CH}_3$ ), 2.71 (t, 2H,  $^3J_{\text{HH}}$  6.9,  $\text{CH}_2\text{CH}_2\text{CH}_2\text{CH}_3$ ), 3.22 (ddd, 1H,  $^2J_{\text{HH}}$  12.1,  $^3J_{\text{HP}}$  7.9,  $^3J_{\text{HH}}$  6.2,  $\text{CH}_\text{A}\text{H}_\text{B}$ ), 3.42 (ddd, 1H,  $^2J_{\text{HH}}$  12.1,  $^3J_{\text{HP}}$  9.8,  $^3J_{\text{HH}}$  8.2,  $\text{CH}_\text{A}\text{H}_\text{B}$ ), 3.99 (br s, 1H,  $\text{CHP}$ ), 6.49 (d, 2H,  $^3J_{\text{HH}}$  8.7,  $\text{H}_\text{Ar}$ ), 7.02 (d, 2H,  $^3J_{\text{HH}}$  8.7,  $\text{H}_\text{Ar}$ ), 7.14-7.24 (m, 9H,  $\text{Ph} + \text{Ph}_2$ ), 7.37-7.41 (m, 1H,  $\text{Ph}_2$ ), 7.50-7.61 (m, 3H,  $\text{Ph}_2$ ), 7.81-7.84 (m, 2H,  $\text{Ph}_2$ ) and not observable NH;  $^{13}\text{C}\{^1\text{H}\}$  NMR (100 MHz,  $\text{CDCl}_3$ ):  $\delta$  13.89 ( $\text{CH}_2\text{CH}_2\text{CH}_2\text{CH}_3$ ), 20.32 ( $\text{CH}_2\text{CH}_2\text{CH}_2\text{CH}_3$ ), 31.62 ( $\text{CH}_2\text{CH}_2\text{CH}_2\text{CH}_3$ ), 47.17 (d,  $^1J_{\text{CP}}$  76.7,  $\text{PCH}$ ), 48.97 ( $\text{CH}_2\text{N}$ ), 49.65 ( $\text{CH}_2\text{CH}_2\text{CH}_2\text{CH}_3$ ), 109.30 ( $\text{C}_4$ ), 124.72 (d,  $^3J_{\text{CP}}$  17.9,  $\text{C}_2$ ), 127.11 (d,  $^1J_{\text{CP}}$  85.5,  $\text{C}_i$ ), 127.67 (d,  $^5J_{\text{CP}}$  2.9,  $\text{C}_4$ ), 128.22 (d,  $^3J_{\text{CP}}$  11.8,  $\text{C}_m$ ), 128.29 (d,  $^4J_{\text{CP}}$  2.9,  $\text{C}_3$ ), 129.02 (d,  $^3J_{\text{CP}}$  11.1,  $\text{C}_m$ ), 129.15 ( $\text{d}_{\text{left}}$ ,  $\text{C}_i$ ), 130.13 (d,  $^3J_{\text{CP}}$  5.3,  $\text{C}_2$ ), 131.30 ( $\text{C}_3$ ), 131.79 (d,  $^4J_{\text{CP}}$  2.6,  $\text{C}_p$ ), 132.21 (d,  $^4J_{\text{CP}}$  2.7,  $\text{C}_p$ ), 132.49 (d,  $^2J_{\text{CP}}$  8.6,  $\text{C}_o$ ), 132.69 (d,  $^2J_{\text{CP}}$  8.5,  $\text{C}_o$ ), 134.13 (d,  $^2J_{\text{CP}}$  5.3,  $\text{C}_1$ ) 150.21 (d,  $^2J_{\text{CP}}$  4.2,  $\text{C}_1$ );  $^{31}\text{P}\{^1\text{H}\}$  NMR (81 MHz,  $\text{CDCl}_3$ ):  $\delta$  10.73;  $m/z$  (EI): 532 ( $\text{M}^+ + 2$ , 73%), 531 ( $\text{M}^+ + 1$ , 60), 530 ( $\text{M}^+$ , 100), 458 (96), 201 (45), 183 (98); HRMS (ESI): calcd for  $\text{C}_{30}\text{H}_{33}\text{BrN}_2\text{P} [\text{M} + \text{H}]^+$ , 531.1559; found, 531.1559.

**6a** ( $R^1 = 4\text{-CH}_3\text{C}_6\text{H}_4$ ,  $R^2 = \text{H}$ ,  $R^3 = \text{CH}_3$ ,  $R^4 = \textit{n}\text{Pr}$ ). Yellow oil (0.17 g, 97%);  $\nu_{\text{max}}(\text{film})/\text{cm}^{-1}$ : 3257, 1607, 1504, 1437, 1326, 737, 696;  $^1\text{H NMR}$  (200 MHz,  $\text{CDCl}_3$ ):  $\delta$  0.85 (t, 3H,  $^3J_{\text{HH}}$  7.3,  $\text{CH}_2\text{CH}_2\text{CH}_3$ ), 1.07 (dd, 3H,  $^3J_{\text{HH}}$  6.2,  $^4J_{\text{HP}}$  1.4,  $\text{CH}_3\text{CH}$ ), 1.30-1.42 (m, 2H,  $\text{CH}_2\text{CH}_2\text{CH}_3$ ), 2.17 (s, 3H,  $\text{CH}_3$ ), 2.22-2.35 (m, 2H,  $\text{CH}_2\text{CH}_2\text{CH}_3$ ), 2.42-2.52 (m, 1H,  $\text{PCH}$ ), 2.62-3.01 (m, 3H,  $\text{PCH} + \text{CH}_3\text{CHN} + \text{NH}$ ), 6.60 (d, 2H,  $^3J_{\text{HH}}$  8.0,  $\text{H}_\text{Ar}$ ), 6.81 (d, 2H,  $^3J_{\text{HH}}$  8.0,  $\text{H}_\text{Ar}$ ), 7.42-7.50 (m, 6H,  $\text{Ph}_2$ ), 7.74-7.83 (m, 4H,  $\text{Ph}_2$ );  $^{13}\text{C}\{^1\text{H}\}$  NMR (50 MHz,  $\text{CDCl}_3$ ):  $\delta$  11.95 ( $\text{CH}_2\text{CH}_2\text{CH}_3$ ), 20.52 ( $\text{CH}_3$ ), 22.58 (d,  $^3J_{\text{CP}}$  12.7,  $\text{CH}_3\text{CH}$ ), 23.19 ( $\text{CH}_2\text{CH}_2\text{CH}_3$ ), 35.54 (d,  $^1J_{\text{CP}}$  75.2,  $\text{PCH}_2$ ), 49.05 (d,  $^2J_{\text{CP}}$  3.5,  $\text{CH}_3\text{CH}$ ), 49.17 ( $\text{CH}_2\text{CH}_2\text{CH}_3$ ), 122.62 (d,  $^3J_{\text{CP}}$  18.7,  $\text{C}_2$ ), 126.22 ( $\text{C}_4$ ), 128.78 (d,  $^3J_{\text{CP}}$  11.4,  $\text{C}_m$ ), 128.85 (d,  $^3J_{\text{CP}}$  11.1,  $\text{C}_m$ ), 129.50 (d,  $^4J_{\text{CP}}$  1.6,  $\text{C}_3$ ), 130.45 (d,  $^1J_{\text{CP}}$  78.7,  $\text{C}_i$ ), 131.33 (d,  $^2J_{\text{CP}}$  9.3,  $\text{C}_o$ ), 131.47 (d,  $^1J_{\text{CP}}$  85.2,  $\text{C}_i$ ), 131.65 (d,  $^4J_{\text{CP}}$  3.2, 2  $\text{C}_p$ ), 131.94 (d,  $^2J_{\text{CP}}$  9.0,  $\text{C}_o$ ), 148.24 (d,  $^2J_{\text{CP}}$  3.9,  $\text{C}_1$ );  $^{31}\text{P}\{^1\text{H}\}$  NMR (81 MHz,  $\text{CDCl}_3$ ):  $\delta$  6.78;  $m/z$  (EI): 391 ( $\text{M}^+ + 1$ , 15%), 390 ( $\text{M}^+$ , 10), 291 (100), 183 (43), 105 (41).

**6b** ( $R^1 = 4\text{-CH}_3\text{C}_6\text{H}_4$ ,  $R^2 = \text{H}$ ,  $R^3 = \text{CH}_3$ ,  $R^4 = \textit{n}\text{Bu}$ ). Yellow oil (0.17 g, 92%);  $\nu_{\text{max}}(\text{film})/\text{cm}^{-1}$ : 3417, 1614, 1504, 1438, 1315, 1108, 751, 715;  $^1\text{H NMR}$  (400 MHz,  $\text{CDCl}_3$ ):  $\delta$  0.77 (t, 3H,  $^3J_{\text{HH}}$  7.1,  $\text{CH}_2\text{CH}_2\text{CH}_2\text{CH}_3$ ), 0.96 (dd, 3H,  $^3J_{\text{HH}}$  6.3 Hz,  $^4J_{\text{HP}}$  1.3

Hz,  $\text{CH}_3\text{CH}$ ), 1.13-1.26 (m, 4H,  $\text{CH}_2\text{CH}_2\text{CH}_2\text{CH}_3$ ), 1.75 (s, 3H,  $\text{CH}_3$ ), 2.17-2.25 (m, 2H,  $\text{CH}_3\text{CH}_2\text{CH}_2\text{CH}_2$ ), 2.36-2.42 (m, 1H, PCH), 2.56-2.65 (m, 1H, PCH), 2.79-2.89 (m, 1H,  $\text{CH}_3\text{CHN}$ ), 6.51 (d, 2H,  $^3J_{\text{HH}}$  8.4,  $\text{H}_{\text{Ar}}$ ), 6.71 (d, 2H,  $^3J_{\text{HH}}$  8.4,  $\text{H}_{\text{Ar}}$ ), 7.35-7.42 (m, 6H,  $\text{Ph}_2$ ), 7.65-7.72 (m, 4H,  $\text{Ph}_2$ ) and not observable NH;  $^{13}\text{C}\{^1\text{H}\}$  NMR (100 MHz,  $\text{CDCl}_3$ ):  $\delta$  13.77 ( $\text{CH}_2\text{CH}_2\text{CH}_2\text{CH}_3$ ), 20.20 ( $\text{CH}_3$ ), 20.32 ( $\text{CH}_2\text{CH}_2\text{CH}_2\text{CH}_3$ ), 22.41 (d,  $^3J_{\text{CP}}$  12.5,  $\text{CH}_3\text{CH}$ ), 31.92 ( $\text{CH}_2\text{CH}_2\text{CH}_2\text{CH}_3$ ), 35.24 (d,  $^1J_{\text{CP}}$  74.5, PCH<sub>2</sub>), 48.09 ( $\text{CH}_2\text{CH}_2\text{CH}_2\text{CH}_3$ ), 48.65 (d,  $^2J_{\text{CP}}$  3.3,  $\text{CH}_3\text{CH}$ ), 122.39 (d,  $^3J_{\text{CP}}$  19.0, C<sub>2</sub>), 125.68 (C<sub>4</sub>), 128.47 (d,  $^3J_{\text{CP}}$  11.3, C<sub>m</sub>), 128.54 (d,  $^3J_{\text{CP}}$  11.1, C<sub>m</sub>), 129.03 (d,  $^4J_{\text{CP}}$  1.1, C<sub>3</sub>), 129.95 (d<sub>right</sub>, C<sub>i</sub>), 131.16 (d,  $^2J_{\text{CP}}$  9.1, C<sub>o</sub>), 131.45 (d,  $^4J_{\text{CP}}$  2.5, 2 C<sub>p</sub>), 131.60 (d,  $^2J_{\text{CP}}$  8.8, C<sub>o</sub>), 131.86 (d<sub>left</sub>, C<sub>i</sub>), 148.24 (d,  $^2J_{\text{CP}}$  3.7, C<sub>1</sub>);  $^{31}\text{P}\{^1\text{H}\}$  NMR (81 MHz,  $\text{CDCl}_3$ ):  $\delta$  5.13; HRMS (ESI): calcd for  $\text{C}_{26}\text{H}_{34}\text{N}_2\text{P} [\text{M} + \text{H}]^+$ , 405.2454; found, 405.2457.

**6c** ( $\text{R}^1 = 4\text{-CH}_3\text{OC}_6\text{H}_4$ ,  $\text{R}^2 = \text{H}$ ,  $\text{R}^3 = \text{CH}_3$ ,  $\text{R}^4 = \text{}^n\text{Pr}$ ). Yellow oil (0.17 g, 93%);  $\nu_{\text{max}}(\text{film})/\text{cm}^{-1}$ : 3258, 1614, 1500, 1438, 1314, 1111, 826, 747, 716;  $^1\text{H}$  NMR (400 MHz,  $\text{CDCl}_3$ ):  $\delta$  0.77 (t, 3H,  $^3J_{\text{HH}}$  7.4,  $\text{CH}_2\text{CH}_2\text{CH}_3$ ), 0.98 (dd, 3H,  $^3J_{\text{HH}}$  6.3,  $^4J_{\text{HP}}$  1.3,  $\text{CH}_3\text{CH}$ ), 1.21-1.33 (m, 2H,  $\text{CH}_2\text{CH}_2\text{CH}_3$ ), 2.18-2.26 (m, 2H,  $\text{CH}_2\text{CH}_2\text{CH}_3$ ), 2.56-2.66 (m, 2H, PCH<sub>2</sub>), 2.85-2.87 (m, 1H,  $\text{CH}_3\text{CHN}$ ), 3.61 (s, 3H, OCH<sub>3</sub>), 6.52-6.55 (m, 4H,  $\text{H}_{\text{Ar}}$ ), 7.38-7.46 (m, 6H,  $\text{Ph}_2$ ), 7.66-7.71 (m 4H,  $\text{Ph}_2$ ) and not observable NH;  $^{13}\text{C}\{^1\text{H}\}$  NMR (50 MHz,  $\text{CDCl}_3$ ):  $\delta$  11.84 ( $\text{CH}_2\text{CH}_2\text{CH}_3$ ), 22.53 (d,  $^3J_{\text{CP}}$  12.7,  $\text{CH}_3\text{CH}$ ), 23.09 ( $\text{CH}_2\text{CH}_2\text{CH}_3$ ), 35.30 (d,  $^1J_{\text{CP}}$  74.1, PCH<sub>2</sub>), 48.74 (d,  $^2J_{\text{CP}}$  3.2,  $\text{CH}_3\text{CH}$ ), 49.01 ( $\text{CH}_2\text{CH}_2\text{CH}_3$ ), 55.42 (OCH<sub>3</sub>), 114.17 (C<sub>3</sub>), 123.08 (d,  $^3J_{\text{CP}}$  18.5, C<sub>2</sub>), 128.61 (d,  $^3J_{\text{CP}}$  11.1, C<sub>m</sub>), 128.69 (d,  $^3J_{\text{CP}}$  11.0, C<sub>m</sub>), 129.82 (d<sub>right</sub>, C<sub>i</sub>), 131.43 (d,  $^2J_{\text{CP}}$  9.4, C<sub>o</sub>), 131.55 (d,  $^4J_{\text{CP}}$  3.9, 2 C<sub>p</sub>), 131.70 (d,  $^1J_{\text{CP}}$  85.0, C<sub>i</sub>), 131.95 (d,  $^2J_{\text{CP}}$  9.1, C<sub>o</sub>), 144.51 (d,  $^2J_{\text{CP}}$  3.7, C<sub>1</sub>), 151.55 (C<sub>4</sub>);  $^{31}\text{P}\{^1\text{H}\}$  NMR (81 MHz,  $\text{CDCl}_3$ ):  $\delta$  4.60; HRMS (ESI): calcd for  $\text{C}_{25}\text{H}_{32}\text{N}_2\text{P} [\text{M} + \text{H}]^+$ , 407.2247; found, 407.2251.

**6d** ( $\text{R}^1 = 4\text{-CH}_3\text{OC}_6\text{H}_4$ ,  $\text{R}^2 = \text{H}$ ,  $\text{R}^3 = \text{CH}_3$ ,  $\text{R}^4 = \text{}^n\text{Bu}$ ). Yellow oil (0.14 g, 92%);  $\nu_{\text{max}}(\text{film})/\text{cm}^{-1}$ : 3418, 1614, 1500, 1438, 1316, 1028, 826, 750, 717, 698;  $^1\text{H}$  NMR (400 MHz,  $\text{CDCl}_3$ ):  $\delta$  0.78 (t, 3H,  $^3J_{\text{HH}}$  7.1,  $\text{CH}_2\text{CH}_2\text{CH}_2\text{CH}_3$ ), 0.97 (dd, 3H,  $^3J_{\text{HH}}$  6.3,  $^4J_{\text{HP}}$  1.3,  $\text{CH}_3\text{CH}$ ), 1.13-1.27 (m, 4H,  $\text{CH}_2\text{CH}_2\text{CH}_2\text{CH}_3$ ), 2.19-2.26 (m, 3H, PCH +  $\text{CH}_2\text{CH}_2\text{CH}_2\text{CH}_3$ ), 2.57-2.67 (m, 1H, PCH), 2.81-2.89 (m, 1H,  $\text{CH}_3\text{CHN}$ ), 3.60 (s, 3H, OCH<sub>3</sub>), 6.50-6.56 (m, 4H,  $\text{H}_{\text{Ar}}$ ), 7.35-7.44 (m, 6H,  $\text{Ph}_2$ ), 7.66-7.73 (m 4H,  $\text{Ph}_2$ ) and not observable NH;  $^{13}\text{C}\{^1\text{H}\}$  NMR (100 MHz,  $\text{CDCl}_3$ ):  $\delta$  13.96 ( $\text{CH}_2\text{CH}_2\text{CH}_2\text{CH}_3$ ), 20.47 ( $\text{CH}_2\text{CH}_2\text{CH}_2\text{CH}_3$ ), 22.60 (d,  $^3J_{\text{CP}}$  12.5,  $\text{CH}_3\text{CH}$ ), 32.13 ( $\text{CH}_2\text{CH}_2\text{CH}_2\text{CH}_3$ ), 35.32 (d,  $^1J_{\text{CP}}$  73.5, PCH<sub>2</sub>), 48.33 ( $\text{CH}_2\text{CH}_2\text{CH}_2\text{CH}_3$ ), 48.85 (d,  $^2J_{\text{CP}}$  2.8,  $\text{CH}_3\text{CH}$ ), 55.49 (OCH<sub>3</sub>),

114.24 (d,  $^4J_{\text{HH}}$  1.2, C<sub>3</sub>), 123.16 (d,  $^3J_{\text{CP}}$  18.5, C<sub>2</sub>), 128.67 (d,  $^3J_{\text{CP}}$  11.3, C<sub>m</sub>), 128.76 (d,  $^3J_{\text{CP}}$  11.1, C<sub>m</sub>), 130.85 (d,  $^1J_{\text{CP}}$  92.3, C<sub>i</sub>), 131.37 (d,  $^2J_{\text{CP}}$  9.0, C<sub>o</sub>), 131.50 (d,  $^4J_{\text{CP}}$  2.7, 2 C<sub>p</sub>), 131.79 (d,  $^2J_{\text{CP}}$  8.9, C<sub>o</sub>), 131.80 (d,  $^1J_{\text{CP}}$  85.2, C<sub>i</sub>), 144.56 (d,  $^2J_{\text{CP}}$  3.6, C<sub>1</sub>), 151.63 (C<sub>4</sub>);  $^{31}\text{P}\{^1\text{H}\}$  NMR (81 MHz, CDCl<sub>3</sub>):  $\delta$  4.53; HRMS (ESI): calcd for C<sub>26</sub>H<sub>35</sub>N<sub>2</sub>OP [M + H]<sup>+</sup>, 421.2403; found, 421.2407.

**General procedure for the synthesis of compounds 10 and 11.** A mixture of the *N*-4-tolyl-*P,P*-diphenyl-*P*-alkenyl iminophosphorane **2** or **3** (0.45 mmol) and ( $\pm$ )- $\alpha$ -methylbenzylamine (2 equiv, 0.9 mmol) was heated for 18 h. The reaction crude was chromatographed on silica gel deactivated with 5% Et<sub>3</sub>N in *n*-hexane (elution with AcOEt) to give **10** or **11**.

**10** (R<sup>1</sup> = 4-CH<sub>3</sub>C<sub>6</sub>H<sub>4</sub>, R<sup>2</sup> = Ph, R<sup>3</sup> = H). Yield of diastereoisomers mixture: 0.2 g (85%), dr (*l/u*): 1/1. Colourless oil.  $\nu_{\text{max}}(\text{film})/\text{cm}^{-1}$ : 3232, 1605, 1505, 1438, 1332, 1113, 906, 840, 733;  $^1\text{H}$  NMR (300 MHz; CDCl<sub>3</sub>):  $\delta$  1.18 [d, 3H,  $^3J_{\text{HH}}$  6.6, CH<sub>3</sub>CH (*l* or *u*)], 1.21 [d, 3H,  $^3J_{\text{HH}}$  6.6, CH<sub>3</sub>CH (*l* or *u*)], 2.16 [s, 3H, CH<sub>3</sub> (*l* or *u*)], 2.17 [s, 3H, CH<sub>3</sub> (*l* or *u*)], 3.10-3.29 [m, 4H, CH<sub>2</sub>N (*l* and *u*)], 3.64 [q, 1H,  $^3J_{\text{HH}}$  6.6, CH<sub>3</sub>CH (*l* or *u*)], 3.69 [q, 1H,  $^3J_{\text{HH}}$  6.6, CH<sub>3</sub>CH (*l* or *u*)], 3.72-3.90 (m, 2H, CHP (*l* and *u*)), 6.51 [d, 4H,  $^3J_{\text{HH}}$  8.1, H<sub>Ar</sub> (*l* and *u*)], 6.74-6.78 [m, 4H, H<sub>Ar</sub> (*l* and *u*)], 6.98-7.02 [m, 5H, Ph (*l* and *u*)], 7.07-7.24 [m, 21H, Ph + Ph<sub>2</sub>P (*l* and *u*)], 7.24-7.52 [m, 10H, Ph<sub>2</sub>P (*l* and *u*)], 7.65-7.74 (m, 4H, Ph<sub>2</sub>P (*l* and *u*));  $^{13}\text{C}\{^1\text{H}\}$  NMR (75 MHz; CDCl<sub>3</sub>):  $\delta$  20.55 [CH<sub>3</sub> (*l* and *u*)], 24.26 [CH<sub>3</sub>CH (*l* or *u*)], 24.49 [CH<sub>3</sub>CH (*l* or *u*)], 47.61 [CH<sub>2</sub>N (*l* or *u*)], 47.76 [d,  $^1J_{\text{CP}}$  74.4, CHP (*l* or *u*)], 48.41 [d,  $^1J_{\text{CP}}$  75.0, CHP (*l* or *u*)], 48.63 [CH<sub>2</sub>N (*l* or *u*)], 57.21 [CH<sub>3</sub>CH (*l* or *u*)], 58.17 [CH<sub>3</sub>CH (*l* or *u*)], 123.07 [d,  $^3J_{\text{CP}}$  16.8, C<sub>2</sub> (*l* and *u*)], 125.96 [C<sub>4</sub> (*l* and *u*)], 126.64-128.78 [aromatics (*l* and *u*)], 129.18 [C<sub>3</sub> (*l* and *u*)], 130.39 [br s, C<sub>2'</sub> (*l* and *u*)], 131.28 [C<sub>p</sub> (*l* or *u*)], 131.62 [C<sub>p</sub> (*l* or *u*)], 132.42-132.78 [C<sub>o</sub> (*l* and *u*)], 134.86 [d,  $^2J_{\text{CP}}$  5.2, C<sub>1'</sub> (*l* or *u*)], 135.35 [d,  $^2J_{\text{CP}}$  5.6, C<sub>1'</sub> (*l* or *u*)], 145.10 [C<sub>1''</sub> (*l* or *u*)], 145.53 [C<sub>1''</sub> (*l* or *u*)], 148.52 [C<sub>1</sub> (*l* and *u*)];  $^{31}\text{P}\{^1\text{H}\}$  NMR (121 MHz, CDCl<sub>3</sub>):  $\delta$  7.55 (*l* or *u*), 8.14 (*l* or *u*); *m/z* (EI): 515 (M<sup>+</sup> + 1, 5), 514 (M<sup>+</sup>, 10), 393 (92), 381 (93), 291 (100), 275 (44), 214 (60), 212 (48), 185 (44), 183 (48).

**11** (R<sup>1</sup> = 4-CH<sub>3</sub>C<sub>6</sub>H<sub>4</sub>, R<sup>2</sup> = H, R<sup>3</sup> = CH<sub>3</sub>). Yield of diastereoisomers mixture: 0.19 g (94%), dr (*l/u*): 2/3.

*l-II*: Yield: 0.06 g (30%);  $\nu_{\text{max}}(\text{film})/\text{cm}^{-1}$ : 3270, 1606, 1506, 1436, 1327, 1107, 816, 733, 695;  $^1\text{H}$  NMR (300 MHz; CDCl<sub>3</sub>):  $\delta$  0.91 (dd, 3H,  $^3J_{\text{HH}}$  6.2,  $^4J_{\text{HP}}$  1.0, CH<sub>3</sub>CHCH<sub>2</sub>P), 1.20 (d, 3H,  $^3J_{\text{HH}}$  6.6, CH<sub>3</sub>CHPh), 2.18 (s, 3H, CH<sub>3</sub>), 2.35 (ddd, 1H,  $^2J_{\text{HH}}$

14.8,  $^2J_{HP}$  9.8,  $^3J_{HH}$  5.0,  $CH_AH_B$ ), 2.71 (ddd, 1H,  $^2J_{HH}$  14.8,  $^2J_{HP}$  12.0,  $^3J_{HH}$  7.0,  $CH_AH_B$ ), 2.98 [m, 1H,  $NCH(CH_3)CH_2P$ ], 3.65 [q, 1H,  $^3J_{HH}$  6.6,  $NCH(CH_3)Ph$ ], 6.61 (d, 2H,  $^3J_{HH}$  8.0,  $H_{Ar}$ ), 6.81 (d, 2H,  $^3J_{HH}$  8.0,  $H_{Ar}$ ), 7.04-7.29 (m, 5H, Ph), 7.37-7.54 (m, 6H,  $PPh_2$ ), 7.72-7.81 (m, 4H,  $PPh_2$ );  $^{13}C\{^1H\}$  NMR (75 MHz;  $CDCl_3$ ):  $\delta$  20.55 ( $CH_3$ ), 23.64 (d,  $^3J_{CP}$  10.4,  $CH_3CHCH_2P$ ), 24.05 ( $CH_3CHPh$ ), 35.84 (d,  $^1J_{CP}$  73.1,  $CH_2P$ ), 47.36 (d,  $^2J_{CP}$  2.3,  $CHCH_2P$ ), 56.02 ( $CHPh$ ), 122.80 (d,  $^3J_{CP}$  19.1,  $C_2$ ), 126.08 ( $C_4$ ), 126.58 (2 signals), 128.29, 128.81 (d,  $^3J_{CP}$  11.0, 2  $C_m$ ), 129.42 ( $C_3$ ), 130.33 (d,  $^1J_{CP}$  79.5,  $C_i$ ), 131.59 (br s, 2  $C_p$ ), 131.65 (d,  $^2J_{CP}$  9.3,  $C_o$ ), 131.69 (d,  $^1J_{CP}$  88.6,  $C_i$ ), 131.87 (d,  $^2J_{CP}$  9.3,  $C_o$ ), 146.73 ( $C_{1'}$ ), 148.61 (d,  $^2J_{CP}$  2.9,  $C_1$ );  $^{31}P\{^1H\}$  NMR (121 MHz,  $CDCl_3$ ):  $\delta$  4.75;  $m/z$  (EI): 452 ( $M^+$ , 2), 331 (11), 305 (15), 304 (26), 291 (100), 290 (43), 185 (16), 183 (34).

*u-II*: Yield: 0.11 g (54%);  $\nu_{max}(\text{film})/\text{cm}^{-1}$ : 3249, 1606, 1506, 1437, 1331, 1108, 910, 822, 733, 693;  $^1H$  NMR (300 MHz;  $CDCl_3$ ):  $\delta$  0.99 (dd, 3H,  $^3J_{HH}$  6.0,  $^4J_{HP}$  1.7,  $CH_3CHCH_2P$ ), 1.28 (d, 3H,  $^3J_{HH}$  6.6,  $CH_3CHPh$ ), 2.18 (s, 3H,  $CH_3$ ), 2.19-2.24 (m, 1H,  $CH_AH_B$ ), 2.66-2.80 [m, 2H,  $CH_AH_B$  +  $NCH(CH_3)CH_2P$ ], 3.77 [q, 1H,  $^3J_{HH}$  6.6,  $NCH(CH_3)Ph$ ], 6.62 (d, 2H,  $^3J_{HH}$  8.0,  $H_{Ar}$ ), 6.83 (d, 2H,  $^3J_{HH}$  8.0,  $H_{Ar}$ ), 7.12-7.28 (m, 5H, Ph), 7.31-7.50 (m, 6H,  $PPh_2$ ), 7.57-7.73 (m, 4H,  $PPh_2$ );  $^{13}C\{^1H\}$  NMR (75 MHz;  $CDCl_3$ ):  $\delta$  20.56 ( $CH_3$ ), 22.18 (d,  $^3J_{CP}$  15.1,  $CH_3CHCH_2P$ ), 25.08 ( $CH_3CHPh$ ), 36.71 (d,  $^1J_{CP}$  78.3,  $CH_2P$ ), 45.46 (d,  $^2J_{CP}$  4.1,  $CHCH_2P$ ), 55.01 ( $CHPh$ ), 122.62 (d,  $^3J_{CP}$  19.1,  $C_2$ ), 126.13 ( $C_4$ ), 126.50, 126.93, 128.32, 128.59 (d,  $^3J_{CP}$  11.6,  $C_m$ ), 128.87 (d,  $^3J_{CP}$  11.0,  $C_m$ ), 129.45 ( $C_3$ ), 130.25 (d,  $^1J_{CP}$  90.4,  $C_i$ ), 131.46 (d,  $^2J_{CP}$  8.7,  $C_o$ ), 131.47 (br s,  $C_p$ ), 131.58 (br s,  $C_p$ ), 131.83 (d,  $^1J_{CP}$  79.6,  $C_i$ ), 132.13 (d,  $^2J_{CP}$  9.3,  $C_o$ ), 145.35 ( $C_{1'}$ ), 148.49 (d,  $^2J_{CP}$  4.1,  $C_1$ );  $^{31}P\{^1H\}$  NMR (121 MHz,  $CDCl_3$ ):  $\delta$  6.20;  $m/z$  (EI): 452 ( $M^+$ , 1), 331 (9), 305 (15), 304 (28), 291 (100), 290 (39), 185 (19), 183 (31).
